# Supplementary material for: Surface modification of graphene oxidevianoncovalent functionalization with porphyrins for selective photocatalytic oxidation of alcohols
Source: Royal Society of Chemistry journal article supplement (doi:10.1039/d0nj01141j), 2020-01-01
Supplement: d0nj01141j1.pdf [file d0nj01141j1.pdf]

## Supporting Information

# Surface Modification of Graphene Oxide *via* Noncovalent Functionalization with Porphyrins for Selective Photocatalytic Oxidation of Alcohols

Tossapong Phuangburee,<sup>a</sup> Dmytro Solonenko,<sup>b</sup> Nukorn Plainpan,<sup>a</sup> Patchanita Thamyongkit,<sup>a,c</sup> Dietrich R.T. Zahn,<sup>b</sup> Sakulsuk Unarunotai,<sup>a</sup> Thawatchai Tuntulani,<sup>a</sup> and Pannee Leeladee<sup>\*a,c</sup>

<sup>a</sup> Department of Chemistry, Faculty of Science, Chulalongkorn University, Bangkok 10330, Thailand. E-mail: pannee.l@chula.ac.th

<sup>b</sup> Semiconductor Physics, Chemnitz University of Technology, 09107 Chemnitz, Germany

<sup>c</sup> Research group on Materials for Clean Energy Production STAR, Department of Chemistry, Faculty of Science, Chulalongkorn University, Bangkok 10330, Thailand

## Table of Contents

|                                                                    |     |
|--------------------------------------------------------------------|-----|
| Figure S1 .....                                                    | S3  |
| Figure S2 .....                                                    | S4  |
| Figure S3 .....                                                    | S4  |
| Figure S4 .....                                                    | S5  |
| Figure S5 .....                                                    | S5  |
| Figure S6 .....                                                    | S6  |
| Figure S7 .....                                                    | S6  |
| Figure S8 .....                                                    | S7  |
| Figure S9 .....                                                    | S7  |
| Figure S10 .....                                                   | S8  |
| Figure S11 .....                                                   | S8  |
| Parameters for Gas Chromatography Analysis .....                   | S9  |
| Investigation of photocatalytic activity by $^1\text{H}$ NMR ..... | S9  |
| Table S1 .....                                                     | S10 |

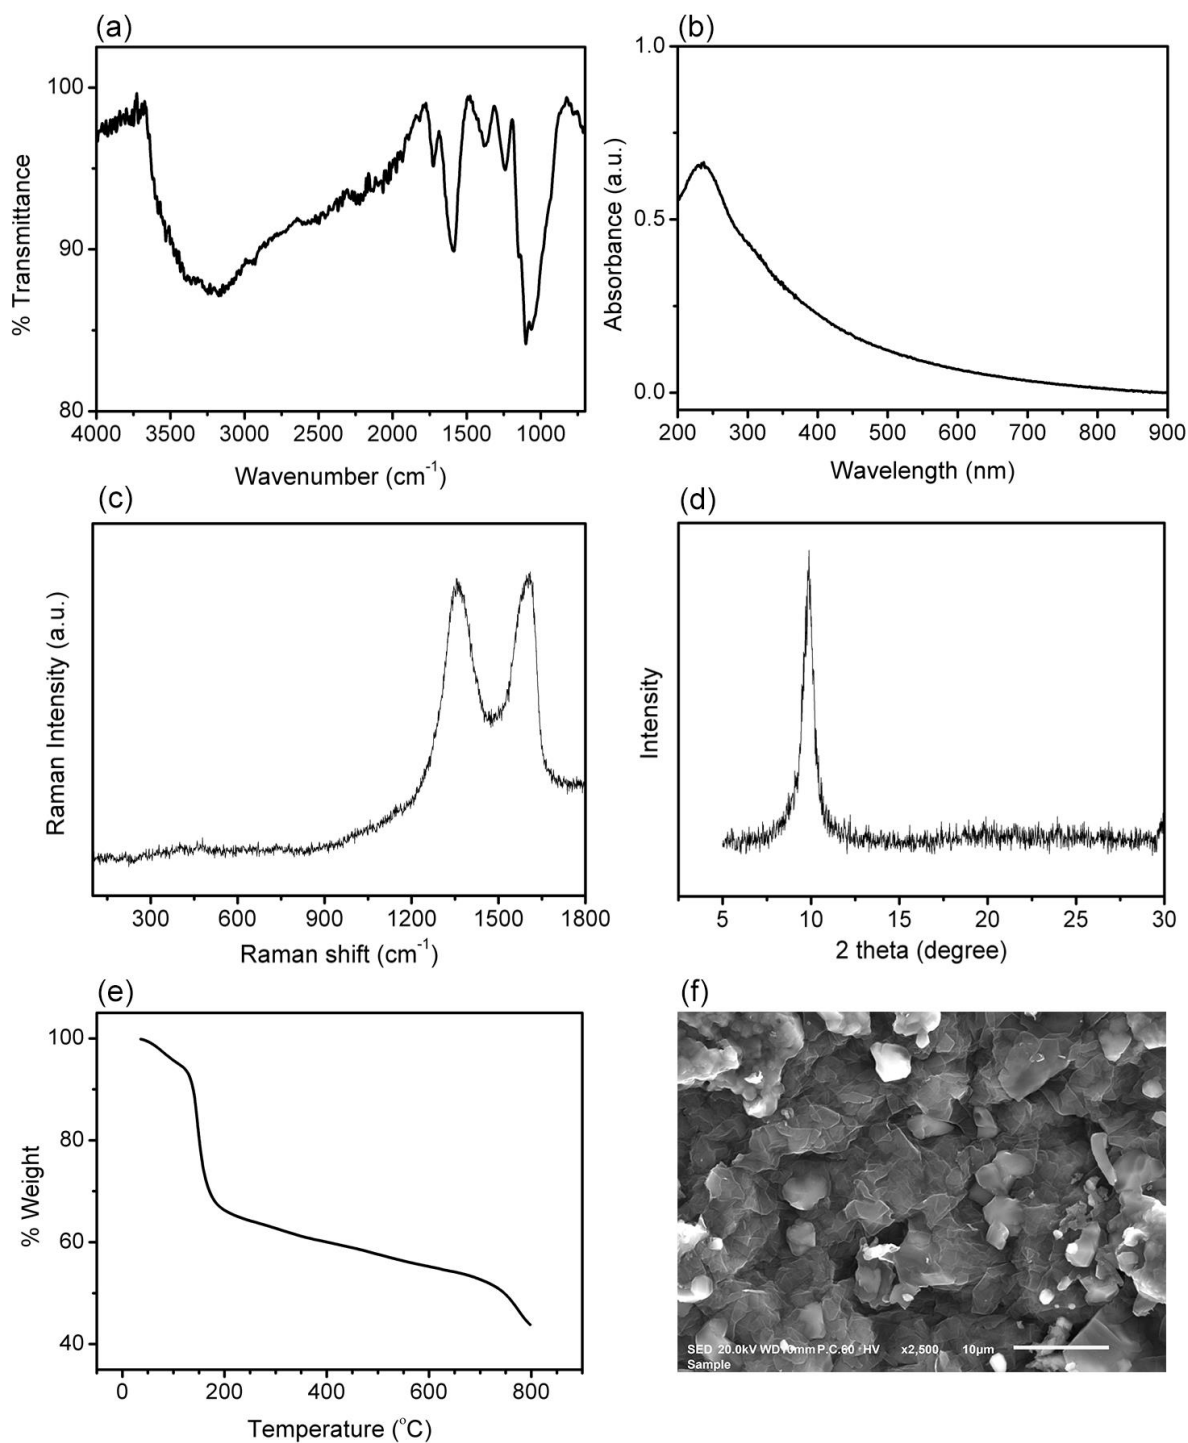

**Figure S1** (a) FTIR spectrum; (b) UV-vis spectrum; (c) Raman spectrum; (d) XRD pattern; (e) thermogram; and (f) SEM image of synthesized graphene oxide (GO).

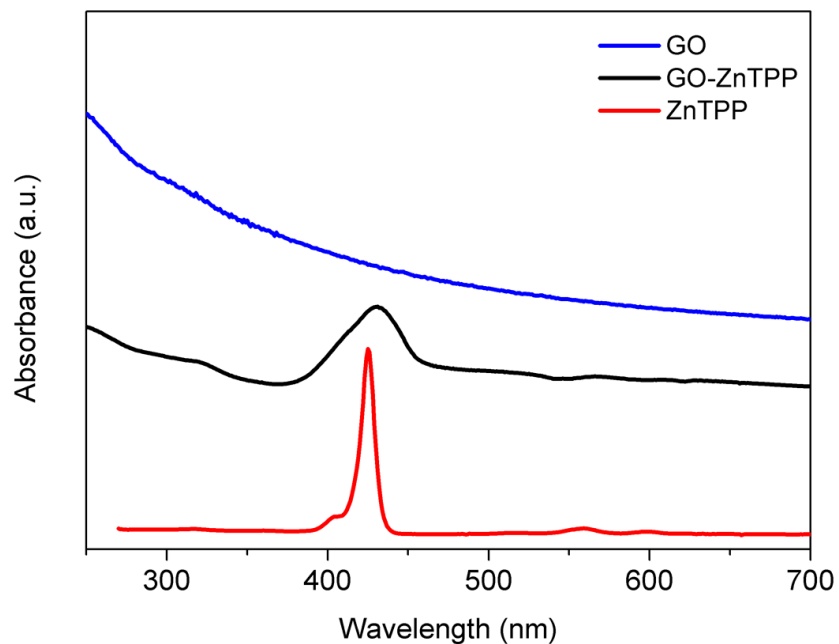

**Figure S2** UV-vis absorption spectra of GO, ZnTPP, and GO-ZnTPP

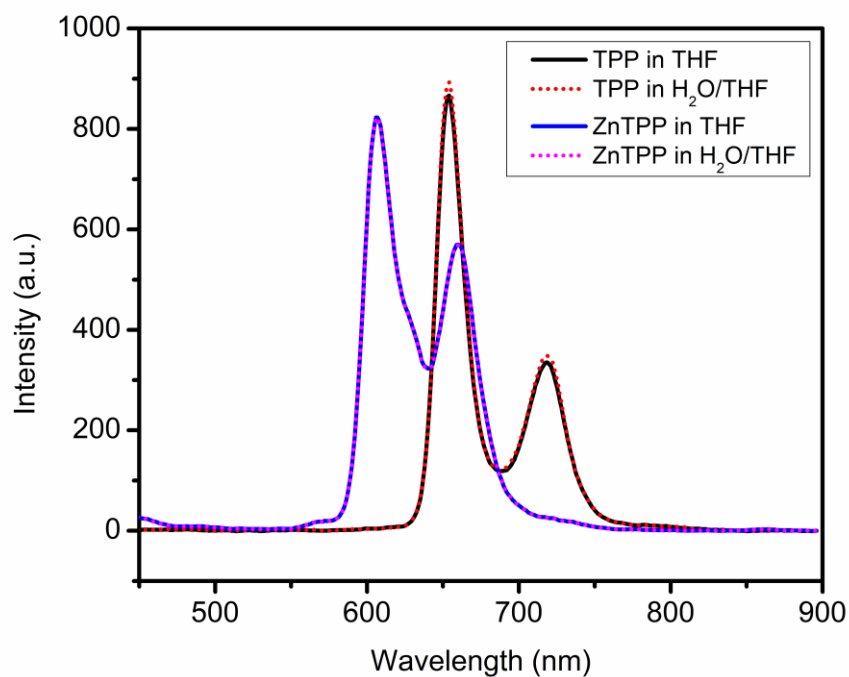

**Figure S3** Fluorescence spectra of TPP in 2.00 mL THF (black), TPP in 2.00 mL H<sub>2</sub>O/THF (1 : 15 v/v) (red dotted), ZnTPP in 2.00 mL THF (blue), ZnTPP in 2.00 mL H<sub>2</sub>O/THF (1 : 15 v/v) (magenta dotted)

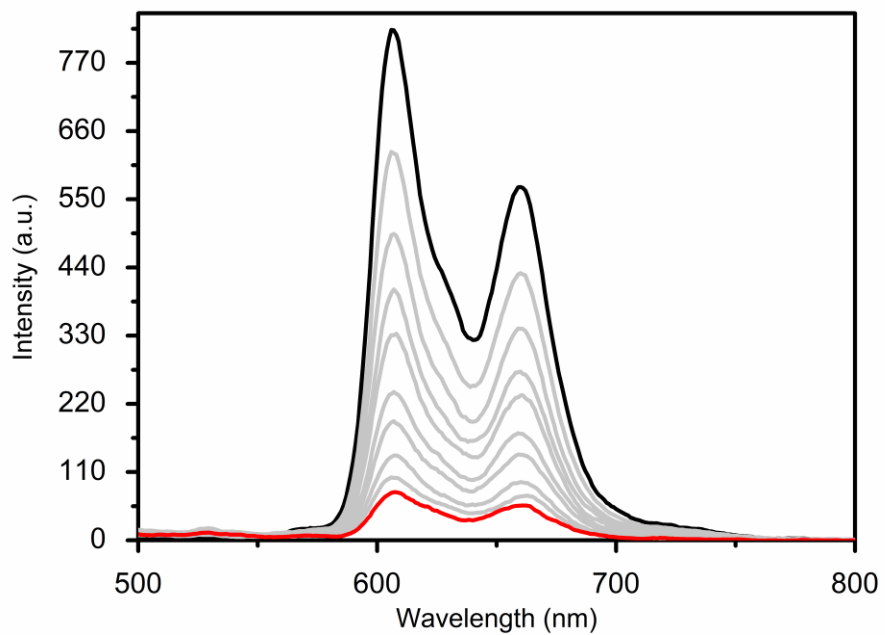

**Figure S4** Fluorescence titration of ZnTPP upon the addition of 2 mg/mL GO (0-125  $\mu$ L)

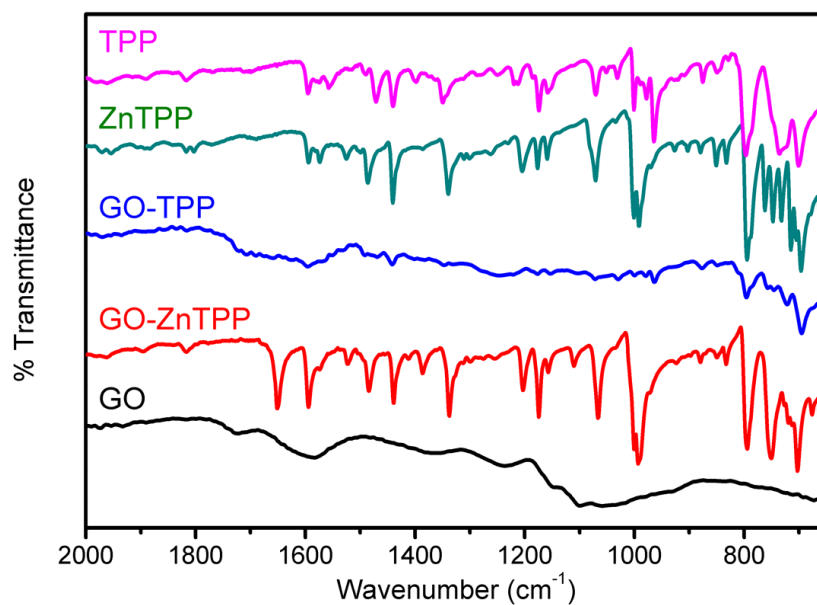

**Figure S5** FTIR spectra of pristine graphene oxide, porphyrin derivatives (TPP and ZnTPP), and composites

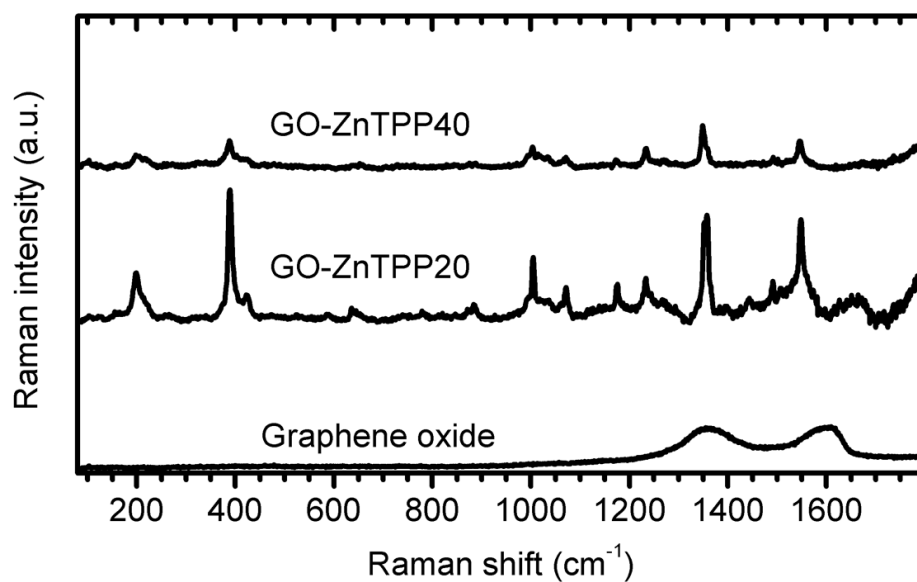

**Figure S6** Raman spectra of graphene oxide flakes and GO-ZnTPP composites prepared in *two weight ratios*; GO-ZnTPP20 (GO:ZnTPP in a 1:2 weight ratio) and GO-ZnTPP40 (GO:ZnTPP in a 1:4 weight ratio). The spectra are stacked for clarity.

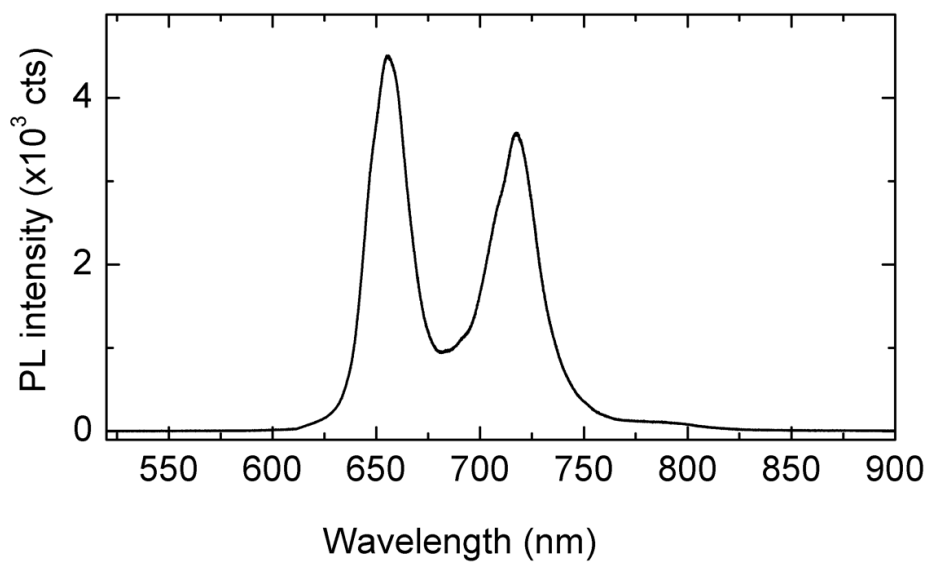

**Figure S7** Photoluminescence spectrum of TPP dissolved in THF.

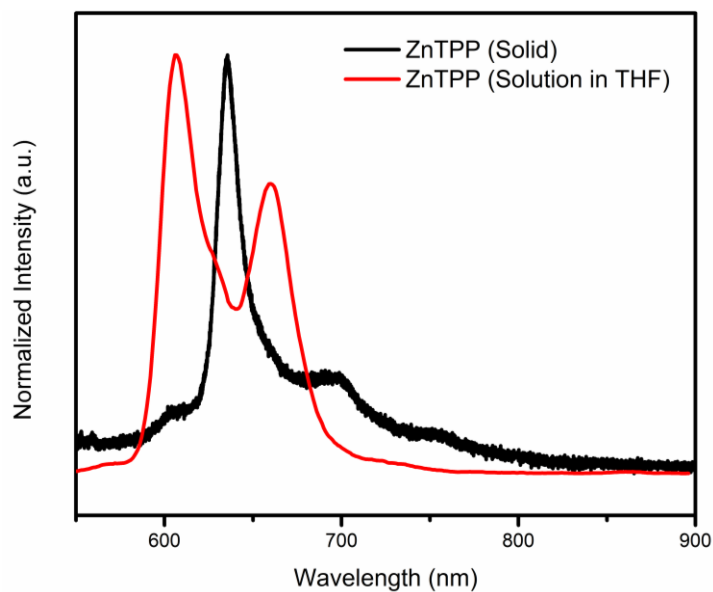

**Figure S8** Photoluminescence spectra of ZnTPP (solid) and ZnTPP dissolved in THF.

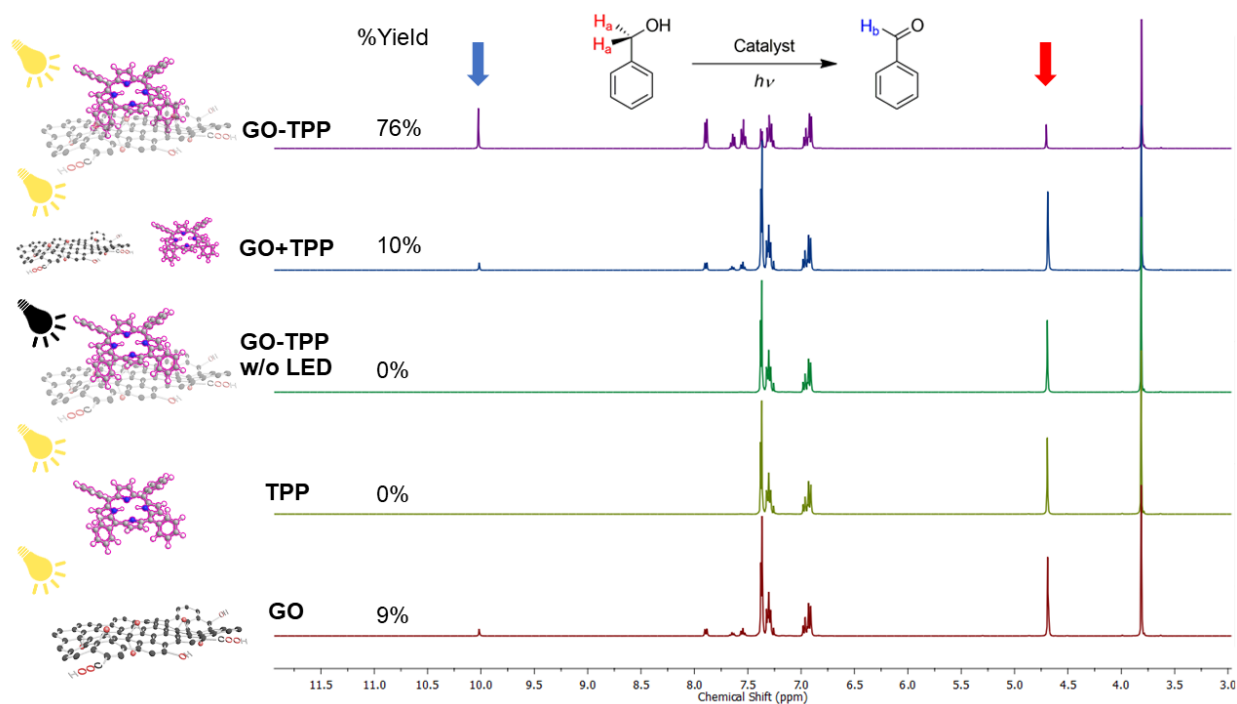

**Figure S9** Comparison of photocatalytic activities of (a) GO, (b) TPP, (c) GO-TPP composite without LED irradiation, (d) non-sonicated GO and TPP mixture, and (e) GO-TPP composite. %yields were analyzed by  $^1\text{H}$  NMR using anisole as an internal standard.

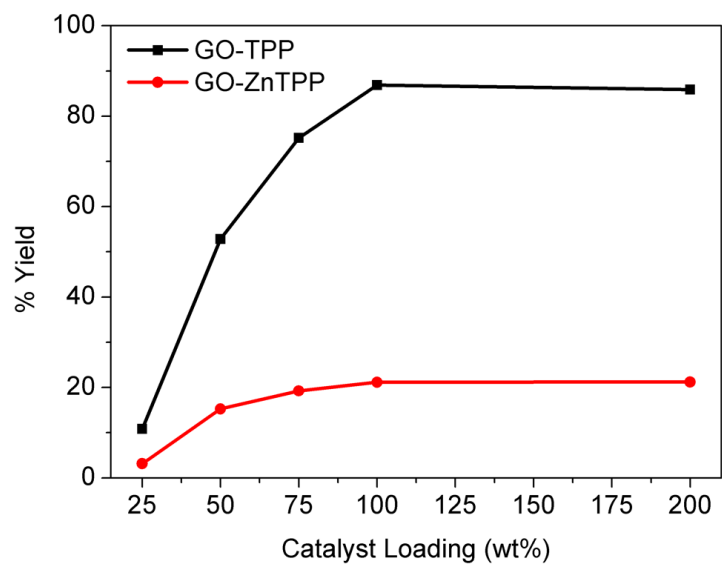

**Figure S10** Photocatalytic reactivities toward oxidation of benzyl alcohol using a variety of catalyst loadings.

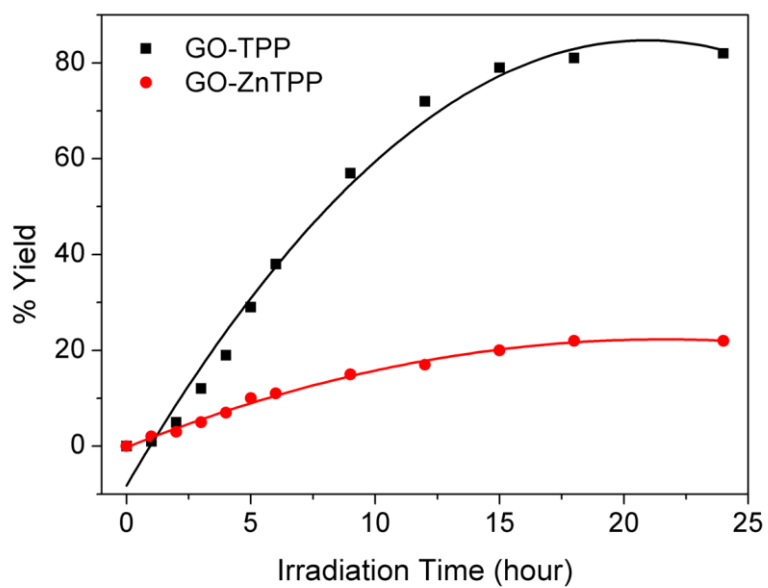

**Figure S11** Monitoring photocatalytic activity of GO-TPP and GO-ZnTPP for oxidation of benzyl alcohol over time.



## Parameters for GC analysis

Instrumentation: Gas chromatography (GC) was performed on a Varian CP-3800 gas chromatograph fitted with HP-5 capillary column (30m x 0.320 ID x 0.25  $\mu$ m) and equipped with a flame-ionization detector. The gas chromatograph parameters are described as follow:

### Determination of benzyl alcohol and benzaldehyde

Internal standard: nitrobenzene, injection temperature: 250 °C, FID detector: 250 °C, carrier gas: nitrogen, carrier gas flow rate: 1.0 mL min<sup>-1</sup>, column temperature: 80 °C for 5 min, ramping up to 250 °C at 10 °C min<sup>-1</sup>, holding at 250 °C for 8 min.

### Determination of phenyl ethanol and acetophenone

Internal standard: nitrobenzene, injection temperature: 230 °C, FID detector: 270 °C, carrier gas: nitrogen, carrier gas flow rate: 1.0 mL min<sup>-1</sup>, column temperature: 80 °C for 3 min, ramping up to 120 °C at 1 °C min<sup>-1</sup>, holding at 120 °C for 2 min. ramping up to 250 °C at 10 °C min<sup>-1</sup>, holding at 250 °C for 8 min.

### Determination of cyclohexanol and cyclohexanone

Internal standard: 1-octanol, injection temperature: 240 °C, FID detector: 270 °C, carrier gas: nitrogen, carrier gas flow rate: 5.0 mL min<sup>-1</sup>, column temperature: 60 °C for 4 min, ramping up to 150 °C at 10 °C min<sup>-1</sup>, holding at 150 °C for 2 min

### Determination of 2-thienylmethanol and thiophene-2-carbaldehyde

Internal standard: nitrobenzene, injection temperature: 270 °C, FID detector: 270 °C, carrier gas: nitrogen, carrier gas flow rate: 1.0 mL min<sup>-1</sup>, column temperature: 70 °C, ramping up to 200 °C at 20 °C min<sup>-1</sup>, holding at 200 °C for 3.5 min.

## Investigation of photocatalytic activity by <sup>1</sup>H NMR

Unless otherwise noted, all reactions were carried out in ambient condition. The reaction mixture of benzyl alcohol (5.0 mg) and a catalyst (5.0 mg of GO, TPP or GO-TPP) was prepared in ultrapure water (2.00 mL) prior to irradiation. After irradiated with white cold LED for 24 h, the reaction mixture was filtered by a 0.22  $\mu$ m Nylon syringe filter. Then, the filtrate was extracted by CH<sub>2</sub>Cl<sub>2</sub> without pH adjustment. The organic phase was collected, dried over NaSO<sub>4</sub> and the solvent was removed in vacuo. After that, the crude product was added anisole (5.0 mg) as an internal standard and re-dissolved in deuterated solvent prior to <sup>1</sup>H NMR measurements.

**Table S1.** Comparison of catalytic activities toward benzyl alcohol oxidation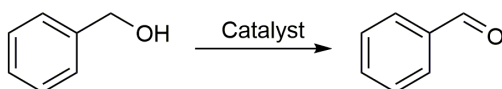

| Catalyst                              | Solvent                                                     | Condition                              | Temperature (°C) | Catalyst Amount <sup>[a]</sup> | Reaction Time (h) | Conversion (%) <sup>[b]</sup> | Ref       |
|---------------------------------------|-------------------------------------------------------------|----------------------------------------|------------------|--------------------------------|-------------------|-------------------------------|-----------|
| GO-TPP                                | water                                                       | LED (visible light)                    | RT               | 100%w                          | 24                | 80 (>99)                      | This work |
| GO                                    | -                                                           | Teflon-lined autoclave                 | 100              | 200%w                          | 12                | 99 (92)                       | S1        |
| Fe <sub>3</sub> O <sub>4</sub> @S/rGO | -                                                           | LED (visible light)                    | 80               | 20 mg cat / 1 mmol BH          | 1.5               | 99 (>99)                      | S2        |
| g-C <sub>3</sub> N <sub>4</sub>       | acetonitrile                                                | 250W- W-filament bulb (>420 nm)        | 25               | 0.1 mg cat / 1 mmol BH         | 28                | 85 (82)                       | S3        |
| CdS-MIL100(Fe)                        | toluene                                                     | 500W Xe lamp (>420 nm)                 | RT               | 80 mg cat / 1 mmol BH          | 5                 | 54 (>99)                      | S4        |
| Au/rGO                                | Na <sub>2</sub> O <sub>3</sub> -NaHCO <sub>3</sub> in water | Teflon-lined autoclave                 | 100              | 15.6 mg cat / 1 mmol BH        | 8                 | 65 (93)                       | S5        |
| Zr-MOF                                | toluene                                                     | 26W helical light bulb (visible light) | 80               | 0.04 molZr / 1 mmol BH         | 24                | 53 (>99)                      | S6        |
| CeO <sub>2</sub> @Pt@TiO <sub>2</sub> | -                                                           | 300W Xe lamp (>420 nm)                 | RT               | 0.08 mg cat / 1 mmol BH        | 5                 | 39 (35)                       | S7        |
| (Pd-Zn)/TiO <sub>2</sub>              | -                                                           | 10%H <sub>2</sub> /Ar, 1 bar           | 120              | 1%w                            | 1                 | 55 (81)                       | S8        |

[a] BH and cat refers to Benzyl alcohol as a substrate for alcohol oxidation and catalyst, respectively. [b] The percentages of selectivity shown in parentheses.

## References

- (S1) D. R. Dreyer, H. P. Jia, C. W. Bielawski, *Angew. Chem. Int. Ed. Engl.* **2010**, *49*, 6813-6816
- (S2) R. Rahimi, M. Moshari, M. Rabbani, A. Azad, *RSC Adv.* **2016**, *6*, 41156-41164
- (S3) M. J. Lima, P. B. Tavares, A. M. T. Silva, C. G. Silva, J. L. Faria, *Catal. Today* **2017**, *287*, 70-77
- (S4) F. Ke, L. Wang, J. Zhu, *Nano Res.* **2015**, *8*, 1834-1846
- (S5) X. Yu, Y. Huo, J. Yang, S. Chang, Y. Ma, W. Huang, *Appl. Surf. Sci.* **2013**, *280*, 450-455
- (S6) T. W. Goh, C. Xiao, R. V. Maligal-Ganesh, X. Li, W. Huang, *Chem. Eng. Sci.* **2015**, *124*, 45-51
- (S7) S. Li, J. Cai, X. Wu, B. Liu, Q. Chen, Y. Li, F. Zheng, *J. Hazard. Mater.* **2018**, *346*, 52-61
- (S8) E. Nowicka, S. Althahban, T. D. Leah, G. Shaw, D. Morgan, C. J. Kiely, A. Roldan, G. J. Hutchings, *Sci. Technol. Adv. Mater.* **2019**, *20*, 367-378
